# Supplementary material
Source: PubMed Central journal article supplement (PMC7105307)
Supplement: supp_RA119.010143_154214_3_supp_474943_q5n7n7.pdf [file supp_RA119.010143_154214_3_supp_474943_q5n7n7.pdf]

## Supporting Information

### Deficiency in the anti-apoptotic protein DJ-1 promotes intestinal epithelial cell apoptosis and aggravates inflammatory bowel disease via p53

**Jie Zhang<sup>a,\*</sup>, Min Xu<sup>b,\*</sup>, Weihua Zhou<sup>a</sup>, Dejian Li<sup>a</sup>, Hong Zhang<sup>a</sup>, Yi Chen<sup>a</sup>, Longgui Ning<sup>a</sup>, Yuwei Zhang<sup>a</sup>, Sha Li<sup>a</sup>, Mengli Yu<sup>a</sup>, Yishu Chen<sup>a</sup>, Hang Zeng<sup>a</sup>, Li Cen<sup>a</sup>, Tianyu Zhou<sup>a</sup>, Xinxin Zhou<sup>a</sup>, Chao Lu<sup>a</sup>, Chaohui Yu<sup>a</sup>, Youming Li<sup>a,§</sup>, Jing Sun<sup>c,§</sup>, Xiaoni Kong<sup>d,§</sup>, Zhe Shen<sup>a,§</sup>**

<sup>a</sup>Department of Gastroenterology, the First Affiliated Hospital, School of Medicine, Zhejiang University, Hangzhou, 310003, China

<sup>b</sup>Department of Liver Surgery, Renji Hospital, School of Medicine, Shanghai Jiao Tong University, 160 Pujian Road, Shanghai, 200127, China.

<sup>c</sup>Department of Gastroenterology, Rui Jin Hospital, Affiliated to Shanghai Jiao Tong University School of Medicine Shanghai, 200031, China

<sup>d</sup>Institute of Clinical Immunology, Department of Liver Diseases, Shu Guang Hospital Affiliated to Shanghai University of Chinese Traditional Medicine, Shanghai, China.

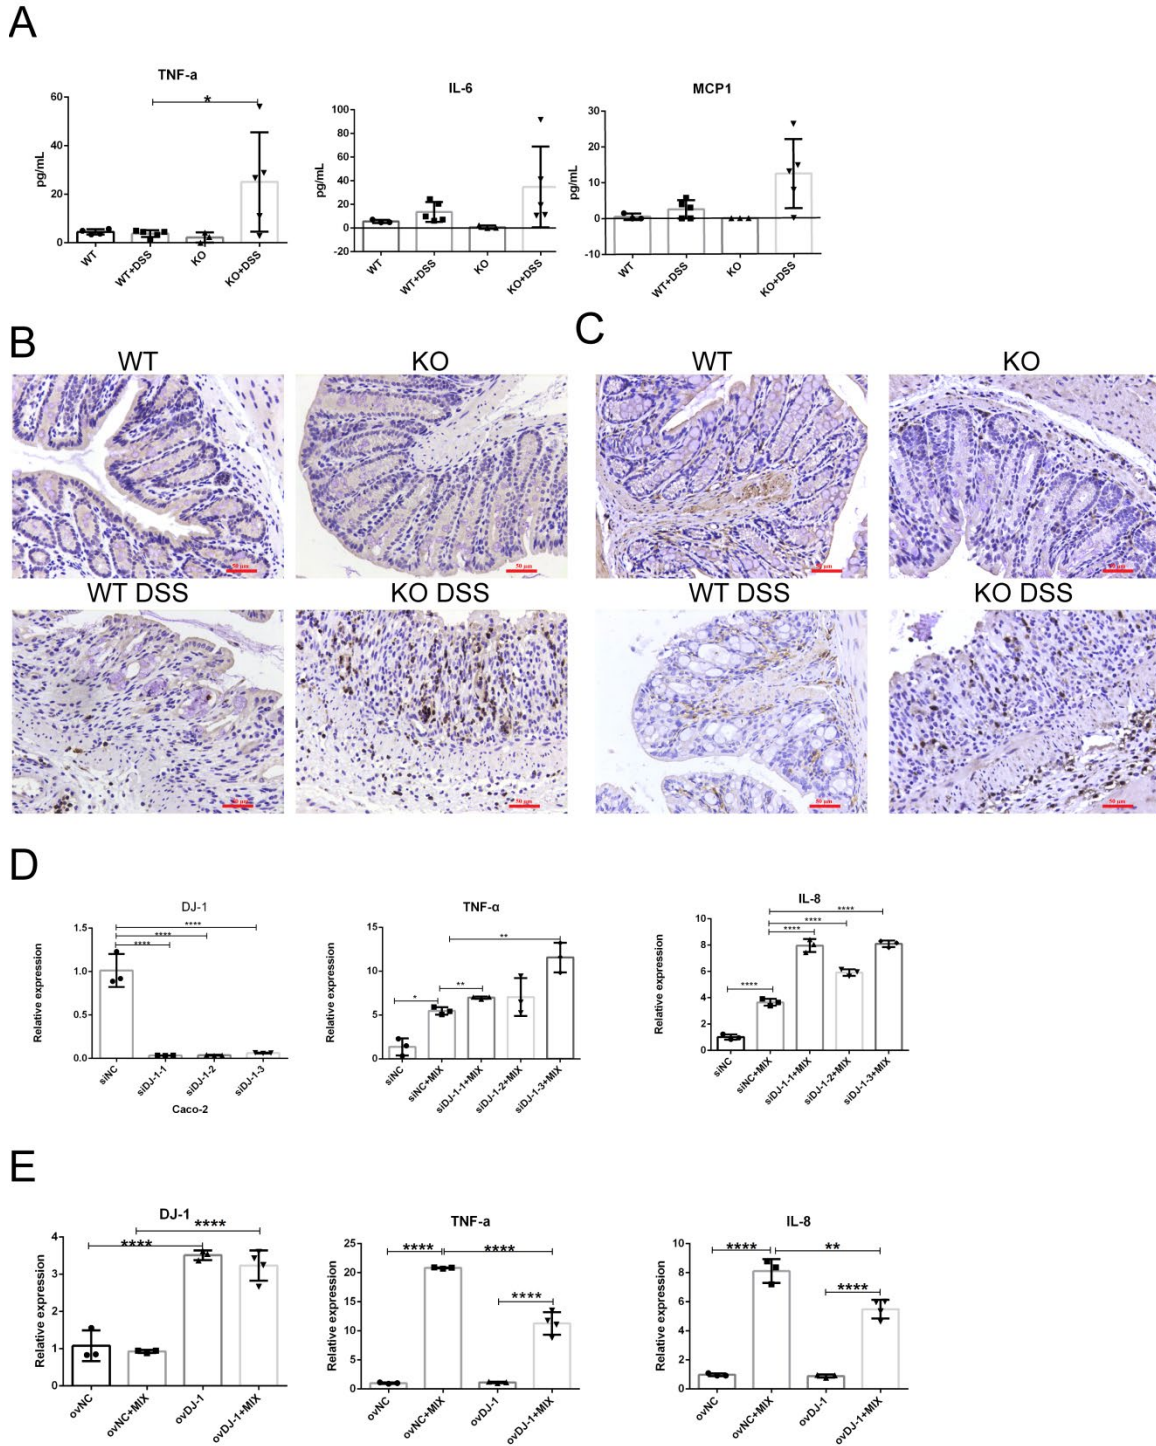

**Supporting Figure 1: DJ-1 deficiency contribute to more inflammatory responses in colonic tissues.** (A) Relative cytokine levels in mice serum were measured by flow cytometry. Values are expressed as the mean  $\pm$ SD, \* $P < 0.05$ . (B) Representative IHC of the neutrophil infiltration marker myeloperoxidase (MPO) staining in colonic sections from the mice without or after DSS administration (original magnification, 200 $\times$ ). (C) Representative IHC of F4/80 in colonic

sections from the mice treated as in A (original magnification, 200×). (D and E) mRNA expression of cytokine and chemokine in Caco-2 cell after knock down (D) or overexpression (E) of DJ-1 for 24 h, followed by MIX treatment for another 24 h. Values are expressed as the mean  $\pm$  SD. \*\* $P < 0.01$ , \*\*\* $P < 0.001$ .

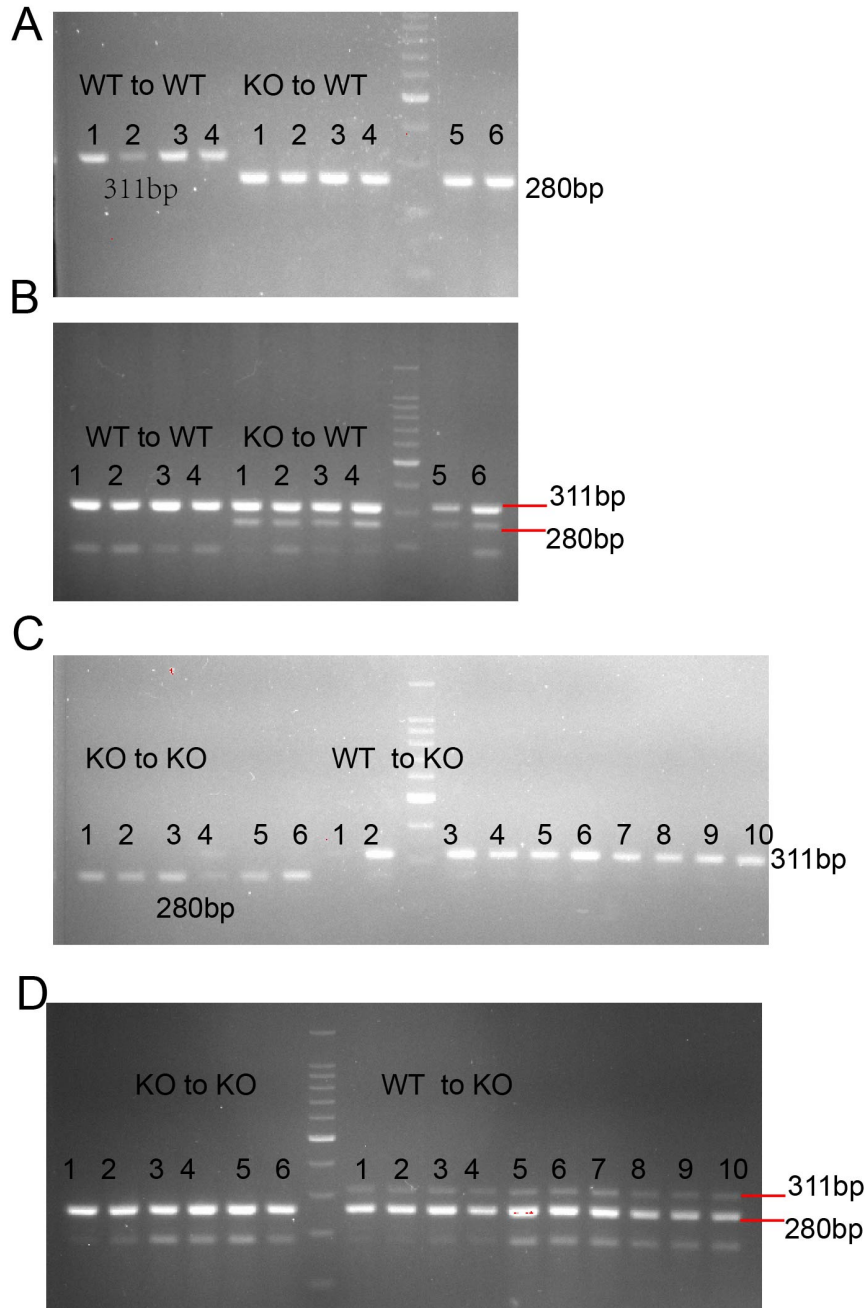

**Supporting Figure 2:** A: PCR analysis of whole blood cells DNA from WT recipient mice 6 week after radiation demonstrated the bone marrow were successful rebuild in WT recipient. B: PCR analysis of liver tissue from WT recipient mice 6 week after radiation. C: PCR analysis of whole blood cells DNA from KO recipient mice 6 week after radiation demonstrated the bone marrow were successful rebuild in KO recipient. D: PCR analysis of liver tissue from KO

recipient mice 6 week after radiation.

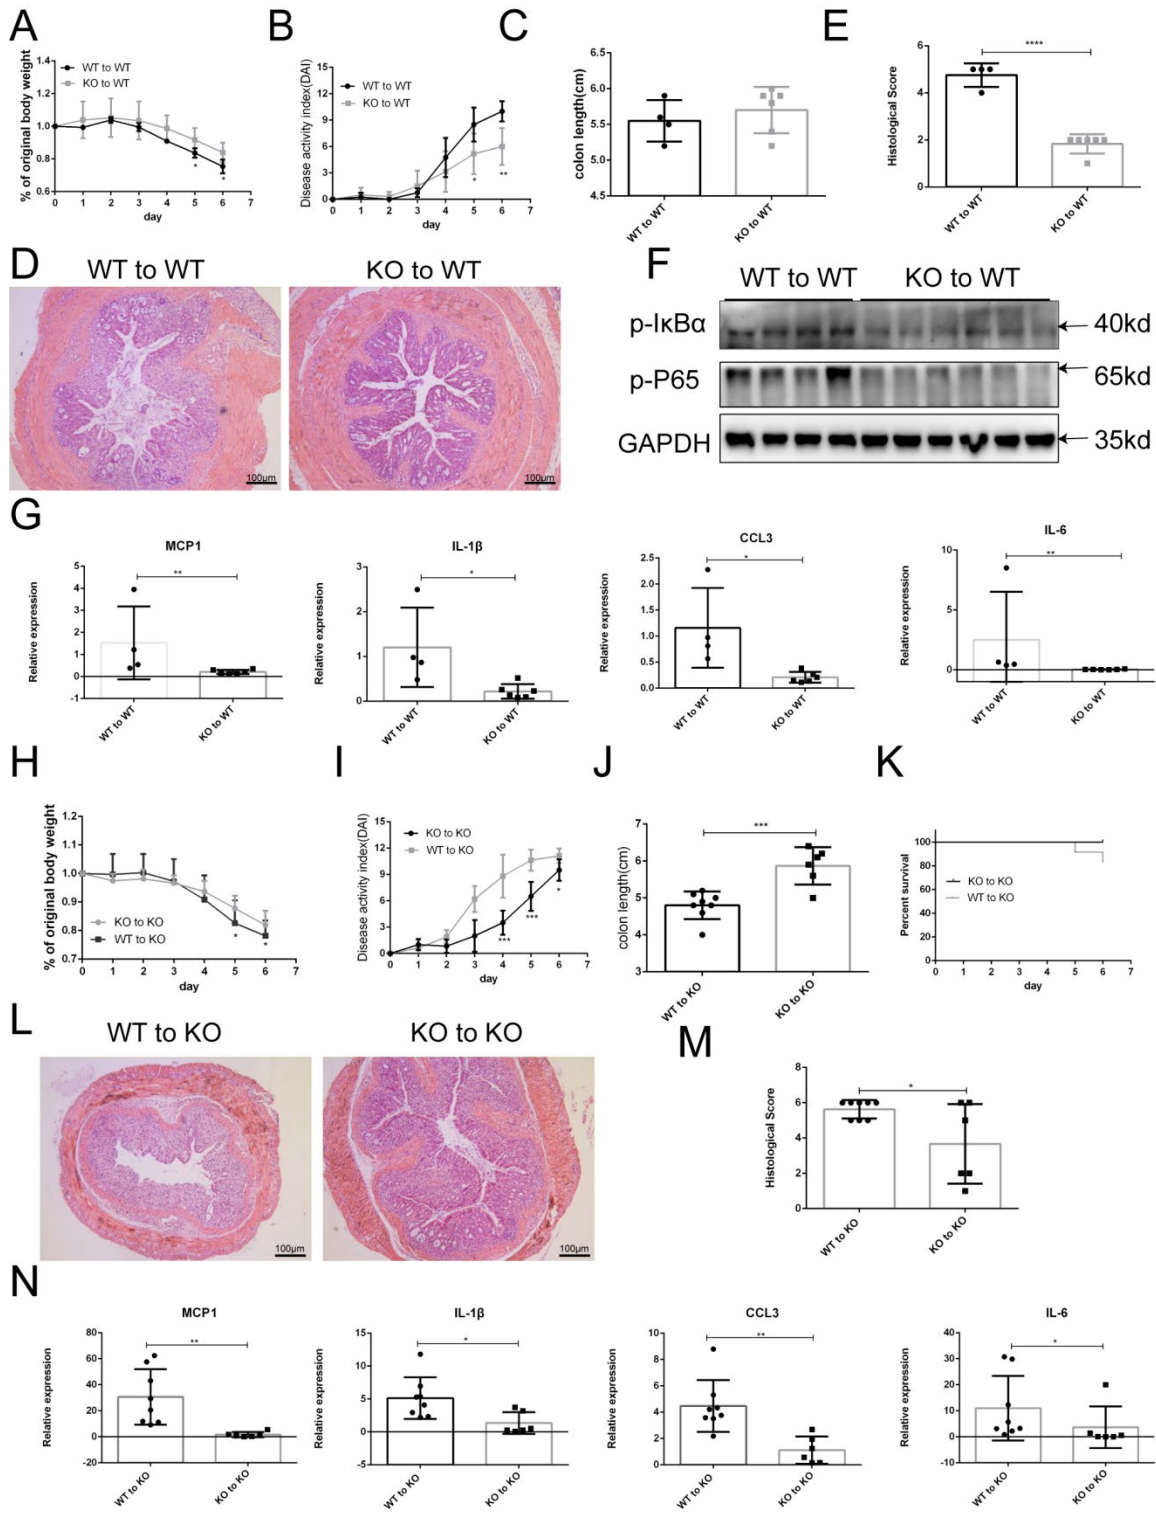

**Supporting Figure 3: Absence of DJ-1 in hematopoietic cells is essential for colitis in the**

**DSS-induced colitis.** (A-G) The WT recipient mice received Wild-type bone marrow (WT to WT,  $n=4$ ) and DJ-1 KO bone marrow (KO to WT,  $n=6$ ) mice were treated with 3.5% DSS for 6 days. Body weight (A) and DAI (B) were scored daily. Mice were killed on day 6 and colon lengths (C) were measured. Values are expressed as the mean  $\pm$  SD.  $**P < 0.01$ ,  $***P < 0.001$ . Histological changes (D) in colon tissues from those mice were examined by hematoxylin and eosin staining. Semiquantitative scoring of histopathology (E) (original magnification, 50 $\times$ ) was then performed as described in the Experimental Procedures. (G) Relative mRNA levels of cytokine and chemokine in colon. (F) Western blotting of I $\kappa$ b $\alpha$ -NF- $\kappa$ b protein expression in colon from mice after DSS administration. (H-N) The KO recipient mice received Wild-type bone marrow (WT to KO,  $n=10$ ) and DJ-1 KO bone marrow (KO to KO,  $n=6$ ) mice were treated with 3.5% DSS for 6 days. Body weight (H), DAI scores (I), colon lengths (J) and survival rate (K) were measured. Histological changes (L) (original magnification, 50 $\times$ ) by HE and Semiquantitative scoring of histopathology (M) were then performed. (N) Relative mRNA levels of cytokine and chemokine in colon. Values are expressed as the mean  $\pm$  SD.  $**P < 0.01$ ,  $***P < 0.001$ .

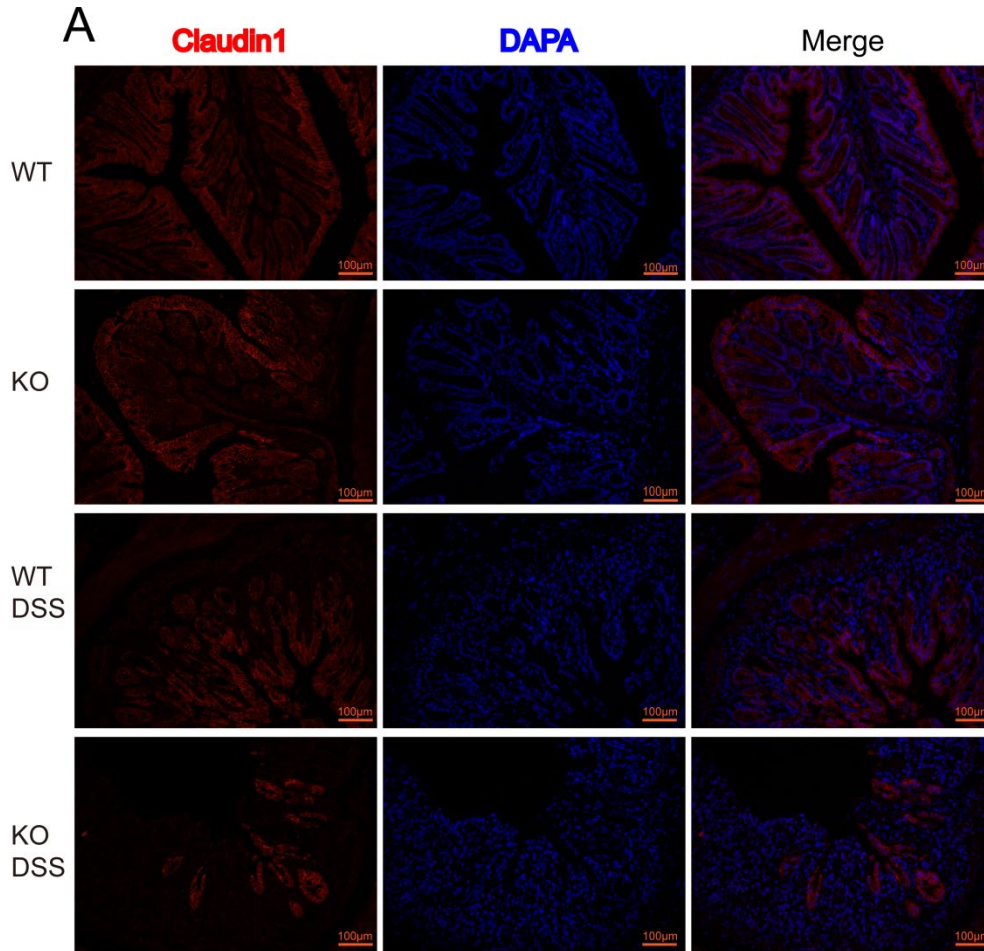

**B**

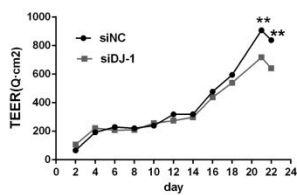

**Supporting Figure 4:** (A) The immunostaining of cell tight junction protein Claudin1 (Red) staining in colonic sections from the mice treated as in Figure 2 (original magnification,  $\times 200$ ). (B) Caco-2 cells were cultured on the transwell inserts and DJ-1 were knock down by siRNA every week, when the TEER reach  $800\Omega \cdot \text{cm}^2$ , transwell inserts were inserted into multiple plate wells containing RAW264.7 cells. To imitate the colon inflammation, LPS ( $1\mu\text{g/ml}$ ) was added to the basolateral compartment of this co-culture system for 24 h.

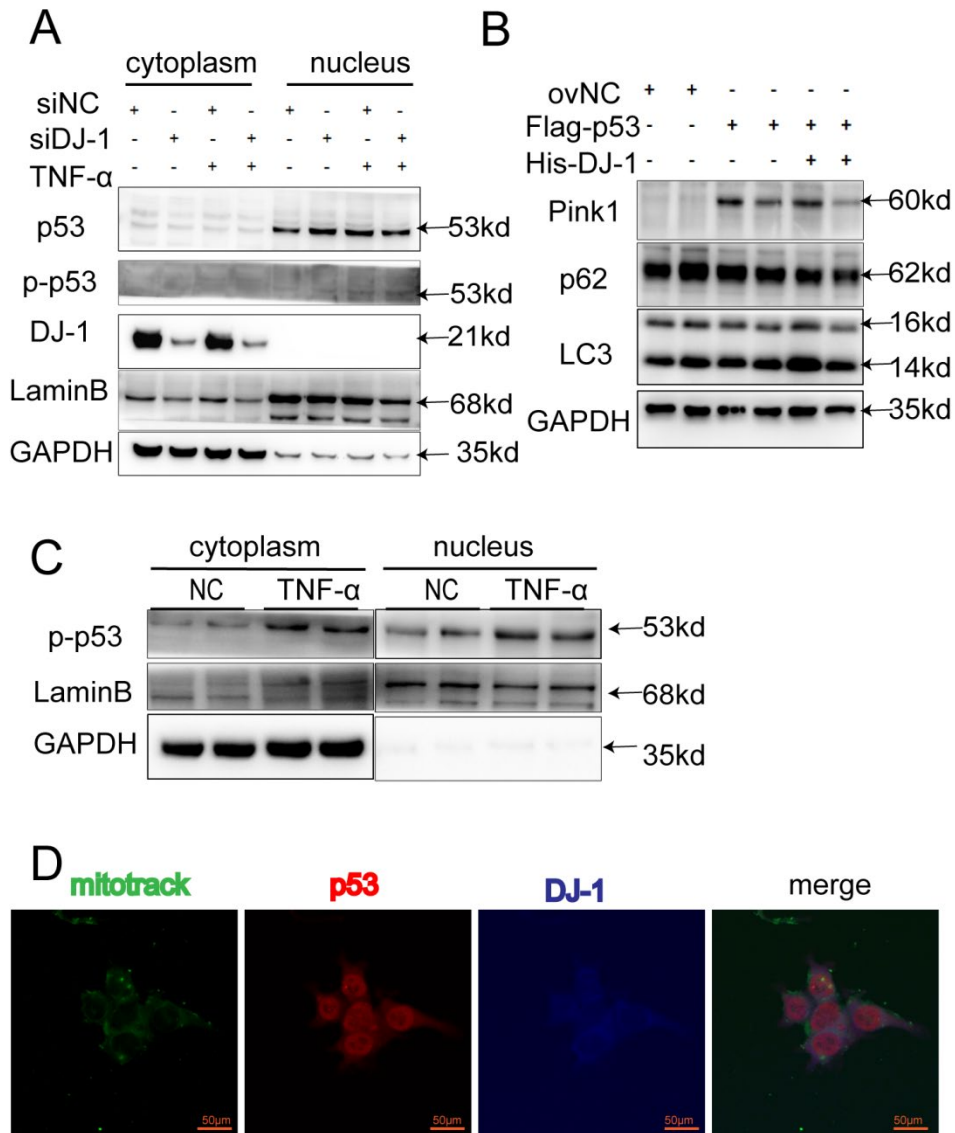

**Supporting Figure 5:** (A) DJ-1 was knocked down in HCT116 cells by siRNA for 24 h and then the cells were stimulated with 100 ng/mL TNF- $\alpha$  for 24 h. Protein were isolated from cytoplasm and nucleus. (B) 293T cell infected with Flag-tagged p53 and his-tagged DJ-1, and stimulated with 100 ng/mL TNF- $\alpha$  for 24 h.(C) HCT116 cell were stimulated with 100 ng/mL TNF- $\alpha$  for 24 h, Protein were isolated from cytoplasm and nucleus. (D) Representative immunofluorescent staining of mitotrack (green), DJ-1-specific antibody (anti-DJ-1, blue) and p53 antibody (anti-p53, red) (original magnification, 400 $\times$ ) in HCT116 cell treated with TNF- $\alpha$  for 24 h.

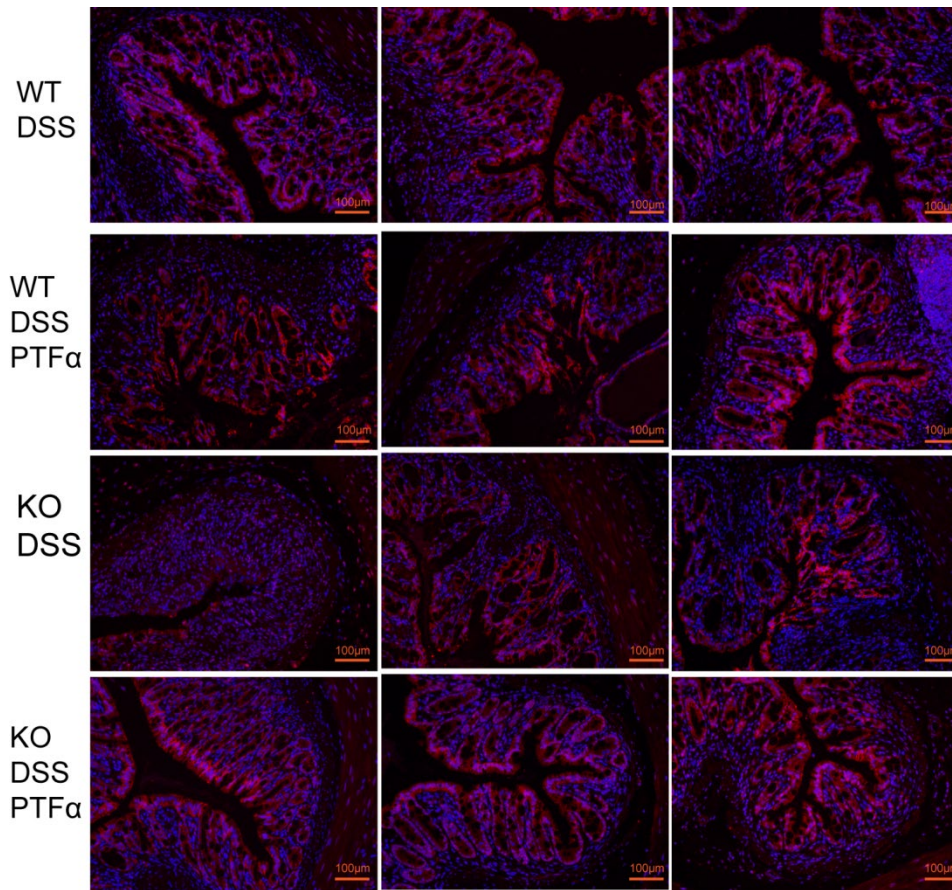

**Supporting Figure 6:** PFT- $\alpha$  was administered by intraperitoneal injection into WT mice ( $n=8$ ) and DJ-1<sup>-/-</sup> mice ( $n=6$ ), and the control group (WT  $n=5$ , KO  $n=7$ ) was intraperitoneally injected with DMSO. Claudin1 (red) staining of colon sections of mice treated as before. Nuclei were stained with DAPI (blue) (original magnification, 200 $\times$ ).



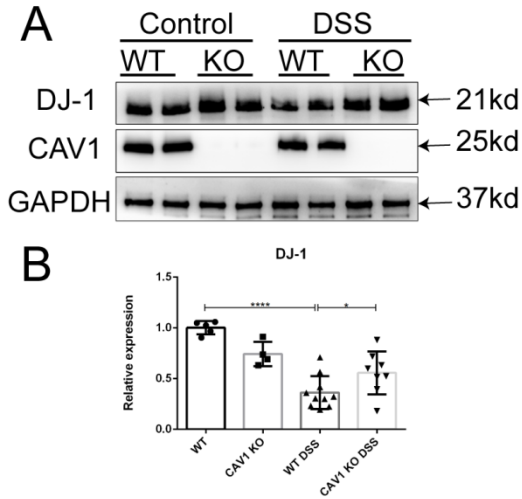

**Supporting Figure 7:** (A-B) Wild-type ( $n=10$ ) and CAV1 KO ( $n=8$ ) mice were treated with 3.5% DSS for 6 days. The DJ-1 protein level (A) and mRNA (B) level were measured in the colon tissue.

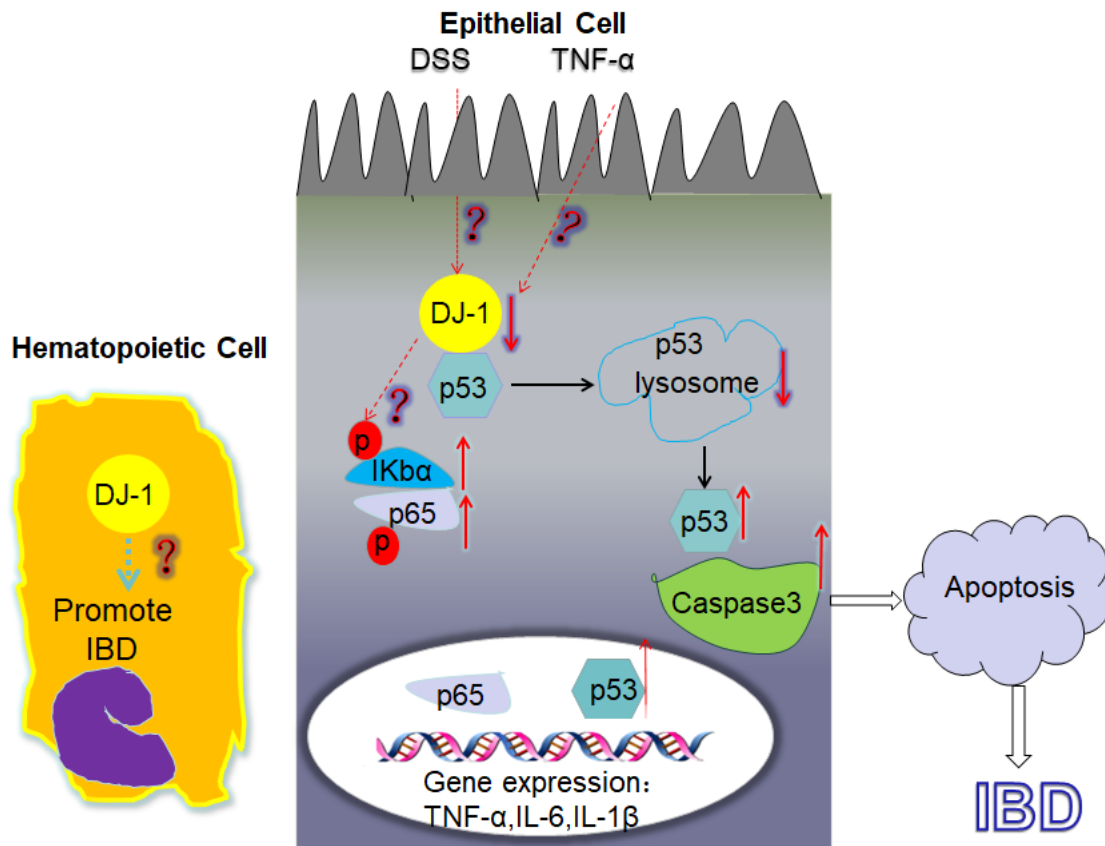

**Supporting Figure 8:** Mechanism schematic diagram of DJ-1 regulating IBD.

**Table S1: Antibodies for Western blot**

| Primary antibody        | Company | Cat#                                 |
|-------------------------|---------|--------------------------------------|
| DJ-1                    | abcam   | #18257 (WB) # 76008 (IP)             |
| p53                     | abcam   | #26 (WB for mouse) #3133( for human) |
| p-P65                   | CST     | #3039                                |
| p-JNK                   | CST     | #4668                                |
| Actin                   | CST     | #3077                                |
| GAPDH                   | CST     | #5174                                |
| p-I $\kappa$ b $\alpha$ | CST     | #9246                                |
| p-IKK $\alpha/\beta$    | CST     | #2697                                |
| Cleaved Caspase-3       | CST     | #9661                                |
| Tubulin                 | CST     | #2148                                |
| Cleaved Caspase-7       | CST     | #8438                                |
| BAX                     | CST     | #2772                                |
| PUMA                    | CST     | #4976                                |

**Table S2: Primers used for qPCR**

| Gene              | Primer sequence          |
|-------------------|--------------------------|
| M DJ-1 F          | AAAACGCAGGGACCATACGAT    |
| M DJ-1 R          | AGGCGACTCAGATAAATTCTGTG  |
| M MCP1 F          | TTAAAAACCTGGATCGGAACCAA  |
| M MCP1 R          | GCATTAGCTTCAGATTTACGGGT  |
| M CCL3 F          | TTCTCTGTACCATGACACTCTGC  |
| M CCL3 R          | CGTGGAATCTTCCGGCTGTAG    |
| M IL-8 F          | TGTTGAGCATGAAAAGCCTCTAT  |
| M IL-8 R          | AGGTCTCCCGAATTGGAAAGG    |
| M TNF- $\alpha$ F | CAGGCGGTGCCTATGTCTC      |
| M TNF- $\alpha$ R | CGATCACCCCGAAGTTCAGTAG   |
| M GAPDH F         | AGGTCGGTGTGAACGGATTTG    |
| M GAPDH R         | GGGGTCGTTGATGGCAACA      |
| M IL-6 F          | TAGTCCTTCCTACCCCAATTTCC  |
| M IL-6 R          | TTGGTCCTTAGCCACTCCTTC    |
| M IL-1 $\beta$ F  | CTCACAAGCAGAGCACAAGC     |
| M IL-1 $\beta$ R  | TCCAGCCATACTTTAGGAAGA    |
| H GAPDH F         | TCAACGACCACTTTGTCAAGCTCA |
| H GAPDH R         | GCTGGTGGTCCAGGGGTCTTACT  |
| H TNF- $\alpha$ F | GAGGCCAAGCCCTGGTATG      |
| H TNF- $\alpha$ R | CGGGCCGATTGATCTCAGC      |
| H DJ-1 F          | AACCGGAAGGGCCTGATAG      |
| H DJ-1 R          | GCAAGAGGGTGTGTTGTA ACT   |
| H IL-8 F          | ACTGAGAGTGATTGAGAGTGGAC  |
| H IL-8 R          | AACCCTCTGCACCCAGTTTTC    |
